# Supplementary material for: Ternary choline chloride/benzene sulfonic acid/ethylene glycol deep eutectic solvents for oxidative desulfurization at room temperature
Source: Royal Society of Chemistry journal article supplement (doi:10.1039/d3ra02524a), 2023-01-01
Supplement: d3ra02524a1.pdf [file d3ra02524a1.pdf]

## Supplementary information

of

### **Ternary choline chloride/benzene sulfonic acid/ethylene glycol deep eutectic solvents for oxidative desulfurization at room temperature**

Ke Fan <sup>a</sup>, Biao Yang <sup>a</sup>, Shanshan Yu <sup>a</sup>, Rongguang Yang <sup>a</sup>, Linfeng Zhang <sup>a</sup>, Weijie

Chi <sup>b</sup>, Minghao Yin <sup>c</sup>, Huadong Wu <sup>a,\*</sup>, Jia Guo <sup>a,\*</sup>

*<sup>a</sup> Key Laboratory of Green Chemical Process of Ministry of Education, Engineering Research Center of Phosphorus Resources Development and Utilization of Ministry of Education, Hubei Key Laboratory of Novel Chemical Reactor and Green Chemical Technology, Wuhan Institute of Technology, Wuhan 430073, P. R. China.*

*<sup>b</sup> Hainan University, School of Science, Hainan University, Haikou, Hainan 570228, PR China.*

*<sup>c</sup> China Electronic Product Reliability and Environmental Testing Research Institute, Guangzhou 511370, Guangdong, P. R. China.*

*\* Corresponding author: Tel: 86-027-87194980;*

*E-mail address: wuhuadong@wit.edu.cn.*

**Table S1. Comparison of desulfurization efficiencies with reported data.**

| Entry | Catalyst                                                             | Initial sulfur content /ppm | T /°C | O/S | Oxidant                       | Sulfur removal /% | Time /min | Ref.      |
|-------|----------------------------------------------------------------------|-----------------------------|-------|-----|-------------------------------|-------------------|-----------|-----------|
| 1     | ChCl/2BSA/EG                                                         | 500(DBT)                    | 25    | 5   | H <sub>2</sub> O <sub>2</sub> | 100               | 100       | This work |
|       |                                                                      | 500(BT)                     | 25    | 5   | H <sub>2</sub> O <sub>2</sub> | 100               | 120       |           |
|       |                                                                      | 500(4,6-DMDBT)              | 25    | 5   | H <sub>2</sub> O <sub>2</sub> | 100               | 120       |           |
| 2     | Acetamide/2GA                                                        | 500(DBT)                    | 60    | 6   | H <sub>2</sub> O <sub>2</sub> | 99.0              | 180       | [1]       |
| 3     | ChCl/1.5BA/PEG                                                       | 500(DBT)                    | 60    | 6   | H <sub>2</sub> O <sub>2</sub> | 99.2              | 120       | [2]       |
|       |                                                                      | 500(4,6-DMDBT)              | 60    | 4   | H <sub>2</sub> O <sub>2</sub> | 57.9              | 120       |           |
| 4     | W/Uio-66(Zr)                                                         | 1000(DBT)                   | 30    | 4   | H <sub>2</sub> O <sub>2</sub> | 100               | 25        | [3]       |
| 5     | Ti-BDC-A                                                             | 500(DBT)                    | 25    | 6   | Cumene hydroperoxide          | 100               | 10        | [4]       |
| 6     | VO-MoO <sub>2</sub> @NC                                              | 500(DBT)                    | 70    | 4   | Cumene hydroperoxide          | 100               | 40        | [5]       |
|       |                                                                      | 500(4,6-DMDBT)              | 70    | 4   | Cumene hydroperoxide          | 100               | 40        |           |
| 7     | Fe <sub>3</sub> O <sub>4</sub> @W-MoO <sub>3</sub> @MOF              | 2000(DBT)                   | 60    | ∞   | O <sub>2</sub>                | 100               | 60        | [6]       |
|       |                                                                      | 2000(BT)                    | 60    | ∞   | O <sub>2</sub>                | 71.2              | 120       |           |
|       |                                                                      | 2000(4,6-DMDBT)             | 60    | ∞   | O <sub>2</sub>                | 80.2              | 120       |           |
| 8     | L-Pro/p-TsOH                                                         | 500(DBT)                    | 60    | 5   | H <sub>2</sub> O <sub>2</sub> | 99.0              | 180       | [7]       |
|       |                                                                      | 500(BT)                     | 60    | 5   | H <sub>2</sub> O <sub>2</sub> | 99.0              | 180       |           |
|       |                                                                      | 500(4,6-DMDBT)              | 60    | 5   | H <sub>2</sub> O <sub>2</sub> | 99.0              | 180       |           |
| 9     | [Hnmp]HCOO                                                           | 500(DBT)                    | 50    | 5   | H <sub>2</sub> O <sub>2</sub> | 99.0              | 180       | [8]       |
| 10    | [MIMPs] <sub>3</sub> PMo <sub>6</sub> W <sub>6</sub> O <sub>40</sub> | 500(DBT)                    | 60    | 2.5 | H <sub>2</sub> O <sub>2</sub> | 100               | 40        | [9]       |
| 11    | FePcF <sub>16</sub> -O-FePcF <sub>16</sub> /4-Mpy                    | 200(DBT)                    | 30    | 40  | H <sub>2</sub> O <sub>2</sub> | 99.4              | 20        | [10]      |

## References

- [1] L. Sun, Z. Zhu, T. Su, W. Liao, D. Hao, Y. Chen, Y. Zhao, W. Ren, H. Ge, H. Lü, Novel acidic eutectic mixture as peroxidase mimetics for oxidative desulfurization of model diesel, *Appl. Catal., B-Environ*, 255 (2019) 117747.
- [2] W. Jiang, H. Jia, H. Li, L. Zhu, R. Tao, W. Zhu, H. Li, S. Dai, Boric acid-based ternary deep eutectic solvent for extraction and oxidative desulfurization of diesel fuel, *Green Chem.*, 21 (2019) 3074-3080.
- [3] G. Ye, H. Wang, W. Chen, H. Chu, J. Wei, D. Wang, J. Wang, Y. Li, In Situ Implanting of Single Tungsten Sites into Defective UiO-66(Zr) by Solvent-Free Route for Efficient Oxidative Desulfurization at Room Temperature, *Angew Chem Int Ed Engl*, 60 (2021) 20318-20324
- [4] G. Ye, Y. Gu, W. Zhou, W. Xu, Y. Sun, Synthesis of Defect-Rich Titanium Terephthalate with the Assistance of Acetic Acid for Room-Temperature Oxidative Desulfurization of Fuel Oil, *ACS Catal.*, 10 (2020) 2384-2394.
- [5] J. Zou, Y. Lin, S. Wu, Y. Zhong, C. Yang, Molybdenum Dioxide Nanoparticles Anchored on Nitrogen-Doped Carbon Nanotubes as Oxidative Desulfurization Catalysts: Role of Electron Transfer in Activity and Reusability, *Adv. Funct. Mater.*, 31 (2021) 2100442.
- [6] S.-W. Li, W. Wang, J.-S. Zhao, Highly effective oxidative desulfurization with magnetic MOF supported W-MoO<sub>3</sub> catalyst under oxygen as oxidant, *Appl. Catal., B-Environ*, 277 (2020) 119224.
- [7] L. Hao, M. Wang, W. Shan, C. Deng, W. Ren, Z. Shi, H. Lu, L-proline-based deep eutectic solvents (DESS) for deep catalytic oxidative desulfurization (ODS) of diesel, *J. Hazard. Mater.*, 339 (2017) 216-222.
- [8] H. Lu, S. Wang, C. Deng, W. Ren, B. Guo, Oxidative desulfurization of model diesel via dual activation by a protic ionic liquid, *J. Hazard. Mater.*, 279 (2014) 220-225.
- [9] J. Wang, B. Yang, X. Peng, Y. Ding, S. Yu, F. Zhang, L. Zhang, H. Wu, J. Guo, Design and preparation of polyoxometalate-based catalyst [MIMPs]<sub>3</sub>PMo<sub>6</sub>W<sub>6</sub>O<sub>40</sub> and its application in deep oxidative desulfurization with excellent recycle performance and low molar O/S ratio, *Chem. Eng. J.*, 429 (2022) 132446.
- [10] Z. Fang, N. Li, Z. Zhao, Z. Zhu, W. Lu, F. Chen, J. Wang, W. Chen, Bio-inspired strategy to enhance catalytic oxidative desulfurization by O-bridged diiron perfluorophthalocyanine axially coordinated with 4-mercaptopyridine, *Chem. Eng. J.*, 433 (2022) 133569.
